# Supplementary material
Source: Springer Nature journal article supplement (https://www.springermedizin.de/resource/supplementary/12916_2012_729_MOESM8_ESM.pdf/9598634)
Supplement: MOESM8 [file 9598634]

| Step in work process                                             | Method         | Description/Result                                                                       |
|------------------------------------------------------------------|----------------|------------------------------------------------------------------------------------------|
| <div>Literature search</div> <div></div>                         | PRISMA         | In text                                                                                  |
| <div>Literature Selection</div> <div></div>                      | In text        | Figures 2 and 3                                                                          |
| <div>Evidence Grading</div> <div></div>                          | CEBM<br>QUADAS | Additional files 2 and 4: Tables S2 and S4<br>Additional files 3 and 5: Tables S3 and S5 |
| <div>Evaluation of Clinical Predictors</div> <div></div>         | In text        | Additional file 1: Table S1                                                              |
| <div>Evidence Summary and Draft Recommendation</div> <div></div> | GRADE          | Table 1                                                                                  |
| <div>Recommendation and Guideline development</div> <div></div>  | Deplhi process | Tables 2, 3 and 4                                                                        |
| <div>Final Guideline</div> <div></div>                           | In text        | Additional files 6-7: Figures S1-2                                                       |
